1 Effects of physical, chemical, and biological ageing  
2 on the mineralization of pine wood biochar by a  
3 *Streptomyces* isolate

4 Nayela Zeba, Timothy D. Berry, Thea L. Whitman\*

5 Department of Soil Science, University of Wisconsin-Madison, Madison, WI, 53703, USA

6

7 \*Email: [twhitman@wisc.edu](mailto:twhitman@wisc.edu)

## 8 Abstract

9 If biochar is to be used for carbon (C) management, we must understand how ageing affects  
10 biochar C mineralization. Here, we incubated aged and unaged eastern white pine wood biochar  
11 produced at 350 and 550 °C with a *Streptomyces* isolate, a putative biochar-decomposing microbe.  
12 Ageing was simulated via exposure to (a) alternating freeze-thaw and wet-dry cycles (physical  
13 ageing), (b) concentrated hydrogen peroxide (chemical ageing) and (c) nutrients and  
14 microorganisms (biological ageing). Elemental composition and surface chemistry (Fourier  
15 Transform Infrared spectroscopy) of biochar samples were compared before and after ageing.  
16 Ageing significantly increased biochar C mineralization in the case of physically aged 350 °C  
17 biochar ( $p < 0.001$ ). Among 350 °C biochars, biochar C mineralization was positively correlated  
18 with an increase in O/C ratio ( $R^2 = 0.78$ ) and O-containing functional groups ( $R^2 = 0.73$ ) post-  
19 ageing, suggesting that surface oxidation during ageing enhanced biochar degradation by the  
20 isolate. However, in the case of 550 °C biochar, ageing did not result in a significant change in  
21 biochar C mineralization ( $p > 0.05$ ), likely due to lower surface oxidation and high condensed  
22 aromatic C content. These results have implications for the use of biochar for long term C storage  
23 in soils.

24 **Synopsis:** This study highlights the impact of ageing on the microbial mineralization of biochar,  
25 which can affect its long-term C storage capacity.

26 **Keywords:** Aging, Biochar C mineralization, FT-IR, Surface oxidation, O/C ratio, pyrogenic C,  
27 PyC, pyrogenic organic matter, PyOM

28

## 29 TOC Graphic

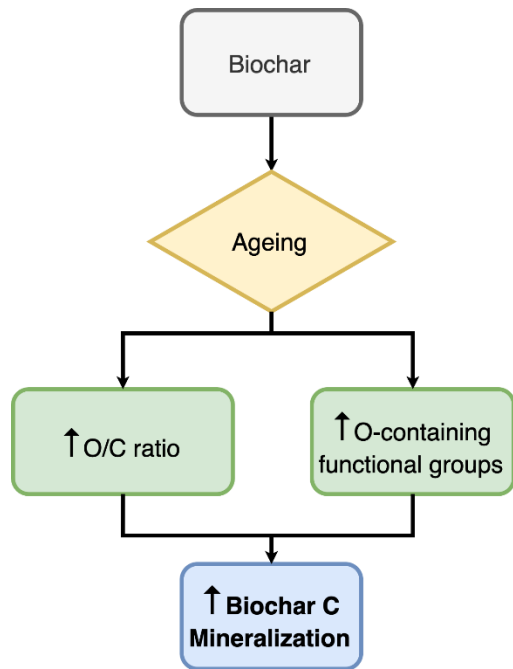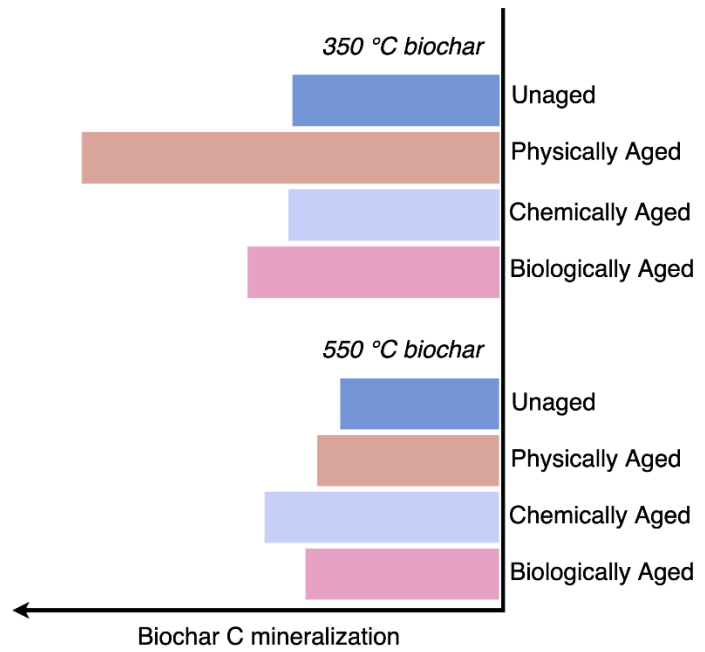

30

## 31      **1. Introduction**

32      Biochar is the carbon-rich solid product of pyrolysis, the process of heating biomass under  
33 oxygen limited conditions <sup>1</sup>. Biochar has the potential to be used as a soil amendment for  
34 agricultural management (e.g., to increase water holding capacity, among other effects) and as a  
35 carbon (C) management strategy to help mitigate greenhouse gas emissions <sup>2</sup>. Converting waste  
36 biomass into biochar can potentially be an effective way to sequester C, since the C contained in  
37 biochar is generally more resistant to mineralization compared to the C in the parent biomass <sup>2,3</sup>,  
38 although the net C effects of biochar production and soil application depend heavily on system-  
39 specific parameters, particularly the baseline scenario for the fate of the parent biomass <sup>4-7</sup>.

40

41      Biochar C is resistant to mineralization primarily because of its high proportion of condensed  
42 aromatic C <sup>2,8,9</sup>, which has been shown to be resistant to mineralization by both abiotic and biotic  
43 processes <sup>10,11</sup>. Further, biochar, while being rich in C, tends to have a low oxygen (O) content,  
44 and low O/C ratios in biochar have been shown to correlate with biochar persistence in soil <sup>12</sup>. The  
45 chemical and physical properties of biochar that affect its persistence are initially determined by  
46 the production conditions, such as feedstock and production temperature <sup>13</sup>, but once the biochar  
47 is deposited in soil, these properties change over time in a process known as ageing <sup>14-17</sup>. Natural  
48 ageing of biochar in soil is a complex process <sup>14</sup>, with multiple relevant mechanisms. We focus on  
49 three of these dominant mechanisms over the course of this paper:

- 50      1. *Physical ageing* - physical breakdown of biochar, primarily by freeze-thaw cycles and  
51      changes in temperature and moisture <sup>14,18-20</sup>
- 52      2. *Chemical ageing* - degradation of biochar through abiotic oxidation upon exposure to various  
53      oxidizing agents <sup>21-23</sup>

54 3. *Biological ageing* - biotic degradation and corresponding physical and chemical  
55 modifications of biochar by microbes and other soil organisms<sup>24–28</sup>

56

57 Commonly reported effects of biochar ageing include a drop in pH, an increase in O content,  
58 and an increase in O-containing functional groups on the surface of aged biochar compared to  
59 unaged biochar. This suggests that ageing of biochar, both naturally and artificially, causes  
60 changes to its elemental composition and surface chemistry<sup>17</sup>. Furthermore, these changes have  
61 been shown to affect properties of biochar such as sorption<sup>18,29</sup> and cation exchange capacity<sup>30,31</sup>.  
62 However, we still have limited information on how these changes will affect soil CO<sub>2</sub> emissions  
63 and the decomposability of biochar itself. Spokas<sup>32</sup> reported an increase in total C mineralization  
64 upon incubation of soil amended with 3 year aged woody biochar, primarily due to chemical  
65 oxidation of biochar surfaces. On the other hand, Liu *et al.*<sup>33</sup> observed lower total C mineralization  
66 in soil incubations amended with 6 year aged wheat straw biochar due to loss of easily  
67 mineralizable C during ageing. The specific effects of ageing on the decomposability of biochar  
68 by soil microbes have not been fully explored<sup>34</sup>.

69

70 Further investigating the relationship between physicochemical changes and biochar  
71 decomposability is one of the primary tranches of this work. Specifically, the aim of this study is  
72 to examine the decomposability of aged biochar by a specific biochar decomposing microbe from  
73 a genus that is common to soils worldwide – a *Streptomyces* isolate. We predicted that the change  
74 in mineralization with ageing will depend on whether the ageing process results in loss of easily  
75 mineralizable C (as indicated by aliphatic chemical groups), which would lead to lower

76 mineralization, or an increase in O content (as indicated by O/C ratios), which would lead to higher  
77 mineralization.

78

## 79 **2. Materials and Methods**

### 80 **2.1. Production of biochar**

81 Biochar was produced from eastern white pine wood chips (*Pinus strobus* (L.)) at highest  
82 treatment temperature (HTT) 350 and 550 °C in a modified Fischer Scientific Lindberg/Blue M  
83 Moldatherm box furnace (Thermo Fisher Scientific, Waltham, MA, USA) under continuous argon  
84 flow (1 L min<sup>-1</sup>) and a residence time of 30 min<sup>35</sup>. Pyrolyzed material was ground using a ball  
85 mill and sieved to collect biochar with particle size <45 µm. The full details of biochar production  
86 can be found in Supplemental Note S1.

87

### 88 **2.2. Ageing of biochar**

89 Biochar produced at both 350 and 550 °C was subjected to one of three different ageing  
90 processes - physical, chemical and biological. We performed all ageing treatments on single  
91 batches of biochar to give us a final set of physically, chemically and biologically aged chars  
92 produced at 350 °C (350PHY, 350CHEM and 350BIO) and 550 °C (550PHY, 550CHEM and  
93 550BIO). A batch of 350 °C unaged biochar (350UN) and 550 °C unaged biochar (550UN) acted  
94 as controls in our study.

95

#### 96 *Physical ageing*

97 For physical ageing (PHY), we subjected biochar samples to 20 freeze-thaw-wet-dry cycles  
98 between -80 °C and 100 °C using pint-sized Mason jars (473.18 mL), building on the method

99 reported by Hale *et al.*<sup>18</sup>. We chose this wide temperature range based on findings by Cheng *et al.*  
100<sup>14</sup> that demonstrated that ageing of biochar can occur over a temperature range from -22 °C to 70  
101 °C and that greater ageing occurs at higher temperatures. Our method simulates an extreme  
102 scenario of severe weathering of biochar likely to occur across many seasonally snow-covered  
103 ecosystems in the northern hemisphere during precipitation-drying cycling and freeze-thaw  
104 cycling<sup>36,37</sup>. Quartz sand (Sargent Welch, Buffalo Grove, IL, USA) was used to simulate a soil  
105 matrix (80 g with a 5% weight biochar amendment) and ultrapure water was added to the jars  
106 containing 4 g of biochar to achieve 40% water holding capacity (WHC). During each cycle, the  
107 jars were frozen at -80 °C for a median time of 7 hours (min 5 h – max 48 h), thawed for a period  
108 of 1-2 hours, following which they were dried in the oven at 100 °C for a median time of 18 hours  
109 (min 14 h – max 54 h) and cooled to room temperature for a period of 1-2 hours. After each drying  
110 period, masses of the jars were measured, and ultrapure water was added to reach 40% WHC.  
111 After 20 cycles, biochar particles were separated from the sand by wet sieving using a US mesh  
112 size no. 270 sieve that allowed the biochar particles less than 45 µm in size to pass through while  
113 retaining the sand particles.

114

### 115 *Chemical ageing*

116 For chemical ageing (CHEM), we treated biochar samples with H<sub>2</sub>O<sub>2</sub> based on the method  
117 reported by Huff and Lee<sup>21</sup>. We used a high concentration of H<sub>2</sub>O<sub>2</sub> based on findings from  
118 previous studies that reported maximum changes in surface chemistry of biochar upon treatment  
119 with 30% w/w H<sub>2</sub>O<sub>2</sub> solution<sup>21,38</sup>. Briefly, 30% w/w H<sub>2</sub>O<sub>2</sub> solution was added to 5 g of biochar at  
120 a ratio of 1 g biochar : 20 mL solution and shaken inside a chemical fume hood for 2 hours at 100  
121 rpm. After 2 hours of shaking, we filtered the biochar samples through sterile Whatman glass

122 microfiber filters (Grade 934-AH Circles – 1.5  $\mu\text{m}$  particle retention) and rinsed with 100 mL  
123 aliquots of ultrapure water to remove any residual  $\text{H}_2\text{O}_2$ .

124

### 125 *Biological ageing*

126 For biological ageing (BIO), we exposed the biochar samples to a microbial community in a  
127 nutrient solution supplemented with glucose (40  $\mu\text{g}$  glucose  $\text{mg}^{-1}$  biochar C), building on the  
128 method reported by Hale *et al.*<sup>18</sup>. By adding glucose, we hoped to stimulate microbial activity and,  
129 with it, the decomposition of biochar. We chose a microbial community expected to be enriched  
130 in microbes that could degrade biochar to further accelerate the biological ageing treatment. We  
131 derived the microbial inoculum from soil samples collected at the Blodgett Forest Research Station  
132 at University of California, Berkeley, which has been used to conduct multiple prescribed burn  
133 studies<sup>39</sup>. The soil samples for the inoculum were collected from 0-10 cm depth at the center of a  
134 slash pile burn after removing the ash layers. To extract the inoculum, we mixed the field-moist  
135 soil samples with Millipore water in sterile 50 mL centrifuge tubes and vortexed for 2 hours at  
136 high speed. After vortexing, the tubes were allowed to stand for 5 minutes and the soil suspensions  
137 were filtered through sterile 2.7  $\mu\text{m}$  Whatman membrane filters into sterile centrifuge tubes. For  
138 the biological ageing process, nutrient solution was prepared from autoclave-sterilized modified  
139 basal salt solution (500 mL  $\text{L}^{-1}$  final biochar nutrient media), modified from Stevenson *et al.*<sup>40</sup>,  
140 filter-sterilized vitamin B12 solution (200  $\mu\text{L}$   $\text{L}^{-1}$  final biochar nutrient media), filter-sterilized  
141 vitamin mixture (200  $\mu\text{L}$   $\text{L}^{-1}$  final biochar nutrient media) and a filter-sterilized trace element  
142 solution (1 mL  $\text{L}^{-1}$  final biochar nutrient media)<sup>41</sup>. The detailed composition of the nutrient  
143 solution is provided as supplementary material accompanying this work (Supplemental Note  
144 S2.1.). We combined 5 g of biochar and glucose supplement (40  $\mu\text{g}$   $\text{mg}^{-1}$  biochar carbon) with 250



145 mL ultrapure water and autoclave-sterilized the mixture. After autoclaving, the biochar mixture  
146 was transferred to a quart-sized (946.35 mL) Mason jar and combined with 250 mL of the nutrient  
147 solution. Note that the pH of the modified basal salt solution, which is a part of the nutrient solution  
148 was adjusted to 7 to obtain a pH neutral final biochar nutrient media (Supplemental Note S2.1).  
149 To the resulting biochar and glucose supplemented nutrient media, we added 8 mL of the filtered  
150 inoculum and incubated the jars at 30 °C in a shaker incubator set to 100 rpm for a period of 2  
151 weeks.

152

### 153 **2.3. Chemical Analyses**

154 Total C and N were determined for aged and unaged biochar samples using a Thermo Scientific  
155 Flash EA 1112 Flash Combustion Analyzer (Thermo Fisher Scientific, Waltham, MA, USA) at  
156 the Department of Agronomy, UW- Madison, WI, USA. Total H was determined using a Thermo  
157 Delta V isotope ratio mass spectrometer interfaced to a Temperature Conversion Elemental  
158 Analyzer (Thermo Fisher Scientific, Waltham, MA, USA) at the Cornell Isotope Laboratory, NY,  
159 USA. Total O was calculated by subtraction as per Enders *et al.*<sup>13</sup>, after determining ash content  
160 of aged and unaged biochar samples using the method prescribed by ASTM D1762-84 Standard  
161 Test Method for Chemical Analysis of Wood Charcoal (See further details in Supplemental Note  
162 S1).

163

164 The pH of aged and unaged biochar samples was measured in deionized water at a 1:20 solid:  
165 solution ratio using an Inlab Micro Combination pH electrode (Mettler Toledo, Columbus, OH,  
166 USA) connected to a Thermo Scientific Orion Star A111 benchtop pH meter (Thermo Fisher

167 Scientific, Waltham, MA, USA). Further details of this procedure can be found in the  
168 Supplemental Note S1.

169  
170 The FT-IR measurements were performed at the U.S. Dairy Forage Research Center, Madison,  
171 WI, USA with a Shimadzu IRPrestige-21 FT-IR spectrometer (Shimadzu, Kyoto, Japan) on the  
172 ATR (Attenuated Total Reflection) absorbance mode. Briefly, 5-10 mg of the biochar sample was  
173 placed on the Zn-Se sample trough and scanned. For each sample, we obtained 256 scans per  
174 sample in the range from 4000 to 650  $\text{cm}^{-1}$  with a resolution of 1  $\text{cm}^{-1}$  (550UN, 350PHY and  
175 550PHY) and 2  $\text{cm}^{-1}$  (350CHEM, 550CHEM, 350BIO, 550BIO and 350UN). Background  
176 corrections were performed between each sample measurement. We assigned wavenumbers for  
177 selected functional groups based on previous studies (S.I. Table S1) and quantified the peak  
178 heights of selected functional groups after spectrum normalization using the Shimadzu IR Solution  
179 FT-IR software (S.I. Table S2). Fractional signal heights for each of the FT-IR peaks were  
180 calculated by dividing the signal height of each of the peaks by the sum total of signal heights of  
181 all peaks of interest to determine the contribution of the signal generated by a particular species to  
182 the full spectra. Further details of this procedure can be found in the Supplemental Note S1.

183  
184 *Multivariate comparisons:* To compare the full FT-IR spectra of biochar samples across  
185 temperatures and different ageing treatments, we used a multivariate dendrogram technique. We  
186 used the continuous normalized data for these analyses, excluding the region from 4000  $\text{cm}^{-1}$ - 3100  
187  $\text{cm}^{-1}$  wavenumber to remove signals from water sorbed to the biochar surface. We used the  
188 dendextend <sup>42</sup> package in R to construct a dendrogram. Euclidean distances between biochar  
189 samples were calculated using the dist() function, and the hclust() function with the complete

190 linkage method used for hierarchical clustering, where the two most similar samples are clustered  
191 together, one after another, forming an ordered hierarchical tree/ dendrogram.

192

#### 193 **2.4. Incubation**

194 We performed the incubations with all the aged biochar (PHY, CHEM and BIO) as well as  
195 unaged biochar (UN) produced at both 350 and 550 °C as solid agar biochar media, inoculated  
196 with a bacterial isolate known to grow on biochar, while tracing CO<sub>2</sub> emissions from each  
197 replicate.

198

199 The bacterial isolate we used was a *Streptomyces* that was isolated on media with eastern white  
200 pine wood biochar produced at 500 °C as the sole C source. The primary motivation for selecting  
201 this specific species is that it was able to grow on biochar media during trial lab incubations.  
202 Further, there is evidence that indicates that bacterial genera that respond positively to biochar  
203 addition in soils include members that have the potential to break down polycyclic aromatic  
204 hydrocarbons (PAHs) <sup>43</sup>, a constituent of biochars, particularly high-temperature ones. We  
205 recovered the isolate from glycerol stocks by streaking onto a biochar (produced from pine wood  
206 at 350 °C) nutrient media agar plate (as described in Supplemental Note S2.) and incubating for 5  
207 days at 37 °C. A single colony from the biochar media plate was inoculated into 30 g L<sup>-1</sup> Tryptic  
208 soy broth (Neogen Culture Media, Lansing, MI, USA) and incubated at 30 °C in a shaking  
209 incubator until growth was visible, characterized by turbidity in the media.

210

211 We performed incubations in quarter-pint sized Mason jars (118.29 mL). Biochar (1 g L<sup>-1</sup> final  
212 biochar nutrient media) and Noble agar suspension (30 g L<sup>-1</sup> final biochar nutrient media) were

213 sterilized by autoclaving and combined with nutrient solution to obtain a pH neutral final biochar  
214 nutrient media (Supplemental Note S2.). For each sample, we poured 40 mL of the final biochar  
215 nutrient media into sterile Mason jars. After the agar solidified, 20  $\mu$ L of the bacterial suspension  
216 in malt extract broth was plated onto the agar surface using the spread plate technique <sup>44</sup>.

217

218 We performed the incubations in replicates of at least three for each treatment and included  
219 uninoculated controls for each treatment. In addition, we included two empty jars as gas flux  
220 blanks for the experiment. After plating, the jars were capped and sealed with sterile, gas-tight lids  
221 provided with fittings that facilitate CO<sub>2</sub> gas measurements and attached to randomly selected  
222 positions on the distribution manifolds (multiplexer) using polyurethane tubing <sup>45</sup>. We measured  
223 the concentration of CO<sub>2</sub> respired in the headspace of each jar at intervals of 3-4 days using a  
224 Picarro G2131i cavity ringdown spectrometer attached to the multiplexer over a period of 1 month.  
225 After each measurement, we flushed the jars with a 400 ppm CO<sub>2</sub>-air gas mixture to ensure aerobic  
226 conditions inside the jar. The precise concentration after flushing each jar was measured and  
227 subtracted from the next time point reading to determine the respired CO<sub>2</sub> in the jar. From previous  
228 biochar incubation trials with the isolate, we confirmed that sampling over a 3-4-day interval did  
229 not lead to hypoxia inside the jars.

230

231 The raw CO<sub>2</sub> readings measured using the multiplexer-Picarro system were processed in R to  
232 calculate biochar C mineralized over the period of incubation using the following packages:  
233 tidyverse <sup>46</sup>, zoo <sup>47</sup>, RColorBrewer <sup>48</sup>, and broom <sup>49</sup>. Briefly, we calculated the cumulative biochar  
234 C mineralized for each replicate at each time point. We corrected the cumulative biochar C  
235 mineralized values for all replicates by subtracting the corresponding mean C mineralized of

236 uninoculated replicates within each treatment and a time series was plotted comparing the biochar  
237 C mineralization trends between the aged and unaged biochar samples.

238

239 *Data Analysis / Statistical Methods:*

240 We performed most calculations in R using the packages `dplyr`<sup>50</sup> and `tidyr`<sup>51</sup>. Figures were  
241 made using the `ggplot2`<sup>52</sup> and `wesanderson`<sup>53</sup> packages and all code used for analyses and figures  
242 in this paper is available at [github.com/nayelazeba/biochar-ageing](https://github.com/nayelazeba/biochar-ageing).

243

244 We performed ANOVA and Tukey's HSD test in R to compare significant differences between  
245 cumulative biochar C mineralized across all aged and unaged biochar treatments for both 350 °C  
246 and 550 °C biochar. In order to correlate total C mineralized during the one-month incubation  
247 period across all aged and unaged biochar samples with fractional signal heights of each of the  
248 selected functional groups and molar O/C ratios, we performed linear regressions in R.

249

250 *Microbial growth*

251 After the incubation period, we disconnected the jars and analyzed images of the agar surfaces  
252 using the software *ImageJ*<sup>54</sup>. The percentage area occupied by the growth of bacterial colonies  
253 was determined for each incubation jar and used as a rough proxy to compare microbial growth  
254 between jars (S.I. Fig. S1).

255

## 256 **3. Results and Discussion**

### 257 **3.1. Effect of ageing on elemental composition**

258 Aged biochars produced at both 350 °C and 550 °C had lower total C and higher total O contents  
259 than unaged biochar, except in the case of 350CHEM, where we did not observe similar trends  
260 (Table 1). The molar O/C ratio increased for 350BIO (0.26) and was highest for 350PHY (0.39)  
261 compared to 350UN (0.20) among 350 °C chars. In the case of 550 °C chars, the O/C ratio  
262 increased for 550BIO (0.18), 550PHY (0.15) and was highest for 550CHEM (0.26) compared to  
263 550UN (0.11). This is consistent with previous studies that have shown an increase in O/C ratio  
264 following natural as well as artificial ageing of biochar through abiotic and biotic processes  
265 <sup>14,19,20,30,55</sup>. The relative decrease in C with ageing is likely due in part to leaching of C-rich  
266 dissolved organic matter <sup>19</sup>. Additionally, abiotic oxidation of C to carbon dioxide and utilization  
267 of C as a substrate by microbes in the case of biologically aged biochars is likely to result in  
268 relatively greater loss of C than O <sup>10,24,30,56</sup>. The higher O content in aged biochars indicates an  
269 increase in O-containing functional groups that is likely due to both abiotic oxidation of C in the  
270 case of chemically and physically aged biochars <sup>14,30</sup> as well as microbially mediated oxidation in  
271 the case of biologically aged biochars <sup>55</sup>. The effects of pyrolysis temperature on the elemental  
272 composition of biochar are discussed in Supplemental Note S4.

273 **Table 1.** Elemental Composition, Elemental Ratio, and pH of the Unaged and Physically,  
 274 Chemically and Biologically aged biochar samples produced at low temperature (350°C) and high  
 275 temperature (550 °C)\*

| HTT<br>(°C) | Ageing<br>treatment | Total C             | Total N               | Total H    | Ash        | Derived<br>total O | O/C  | pH in<br>solution    |
|-------------|---------------------|---------------------|-----------------------|------------|------------|--------------------|------|----------------------|
|             |                     |                     |                       |            |            |                    |      |                      |
| 350         | Unaged              | 75 ± 0.04           | 0.3 ± 0.00            | 3.9 ± 0.01 | 0.6 ± 0.02 | 20.4               | 0.20 | 6.1 ± 0.1            |
|             | Physical            | 61 ± 1.03           | 0.3 ± 0.1             | 2.7 ± 0.04 | 4.3 ± 0.01 | 31.8               | 0.39 | 3.3<br>(N = 1)       |
|             | Chemical            | 80 ± 4.6<br>(N = 4) | 0.3 ± 0.04<br>(N = 4) | 2.5 ± 0.2  | 1.6 ± 0.04 | 15.6               | 0.15 | 4.3 ± 0.02           |
|             | Biological          | 70 ± 1.2            | 0.3 ± 0.01            | 3.5 ± 0.2  | 1.8 ± 0.2  | 24.4               | 0.26 | 4.8 ± 0.06           |
| 550         | Unaged              | 85 ± 1.2<br>(N = 4) | 0.2 ± 0.02<br>(N = 4) | 2.4 ± 0.2  | 0.8 ± 0.03 | 11.9               | 0.11 | 6.9 ± 0.08           |
|             | Physical            | 79 ± 0.1            | 0.4 ± 0.02            | 2.2 ± 0.01 | 3.1 ± 0.2  | 15.8               | 0.15 | 6.5<br>(N = 1)       |
|             | Chemical            | 71 ± 0.2            | 0.3 ± 0.02            | 3.8 ± 0.4  | 0.7 ± 0.05 | 24.4               | 0.26 | 5.0 ± 0.2            |
|             | Biological          | 77 ± 3.7            | 0.3 ± 0.01            | 2.5 ± 0.1  | 2.4 ± 0.1  | 18.2               | 0.18 | 4.8 ± 0.6<br>(N = 4) |

276 \*Note: Data shown represent the mean ± standard deviation based on duplicate measurements  
 277 unless specified otherwise. While ageing caused changes in pH (See Supplemental Note S3 for  
 278 discussion), we controlled for the effects of pH on microbial activity in this study by adjusting the  
 279 pH of the final nutrient biochar media for all samples.

### 280 **3.2. Effect of ageing on surface chemistry**

281 Amongst the ageing treatments, physical ageing altered the surface chemistry of biochar the  
282 most (Fig. 1). For both 350 °C and 550 °C biochar samples, the spectra of physically aged biochar  
283 samples were the most dissimilar from the spectra of unaged biochar samples. While chemical and  
284 biological ageing also caused changes to surface chemistry, the effects appear to be less  
285 pronounced than in the case of physical ageing, as we see these samples cluster together more by  
286 production temperature than treatment method – *i.e.*, production temperature was a more important  
287 determinant of biochar chemistry than ageing treatment. An important factor driving dissimilarity  
288 between 350 °C and 550 °C biochars is the increase in aromatic carbon content and decrease in H  
289 and O-containing functional groups on the surface of biochar with increasing pyrolysis  
290 temperatures <sup>10,11,57</sup> (See Supplemental Note S4 for further discussion on effects of pyrolysis  
291 temperature on surface chemistry). It is interesting to note that the two PHY aged samples are  
292 more similar to each other than to other samples produced at the same pyrolysis temperatures. This  
293 suggests that the physical ageing treatment had a stronger effect on the surface chemistry than  
294 production temperature.

295



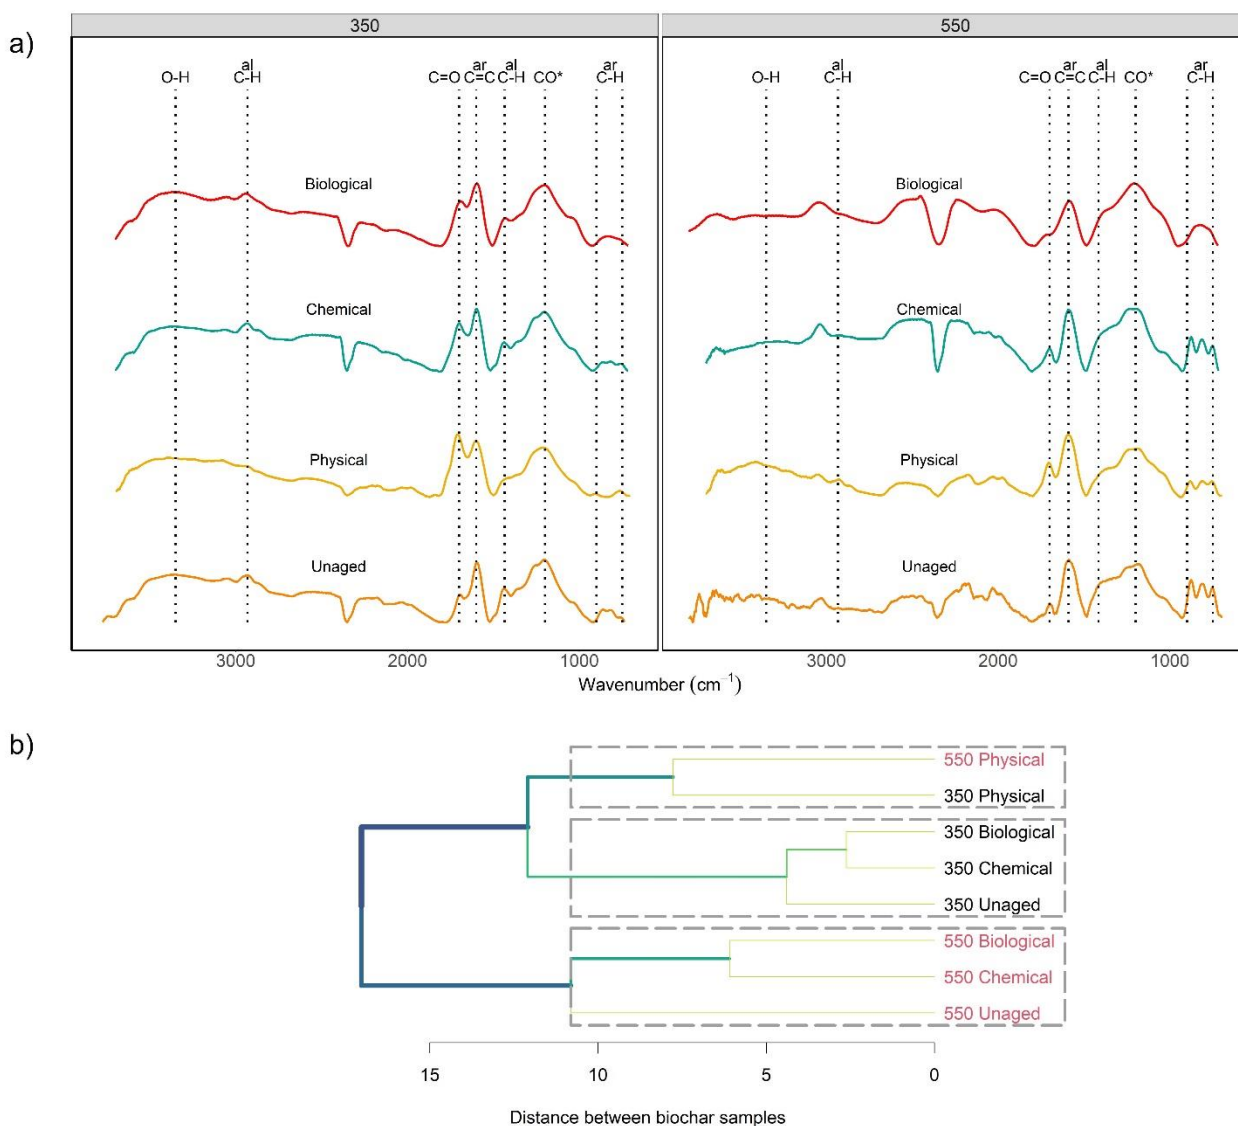

296  
 297 **Figure 1. (a)** FT-IR spectra of unaged and physically, chemically and biologically aged biochar  
 298 samples produced at 350 °C (left panel) and 550 °C (right panel). Labels on top indicate the peak  
 299 names assigned to different functional groups as described in detail in supplementary information  
 300 (O-H: O–H stretching of carboxylic acids, phenols, alcohols at 3370 cm<sup>-1</sup>; al CH: aliphatic C-H  
 301 stretch of CH<sub>3</sub> and CH<sub>2</sub> at ~2932 cm<sup>-1</sup> and C-H bending of CH<sub>3</sub> and CH<sub>2</sub> at 1413 cm<sup>-1</sup>; C=O: C=O  
 302 stretch in carboxylic acids and ketones at ~1701 cm<sup>-1</sup>; ar C=C: aromatic C=C vibrations and  
 303 stretching of quinones at ~1593 cm<sup>-1</sup>; CO\*: C–O stretching, O–H bending of COOH and/or C–OH  
 304 stretching of polysaccharides at ~1200 cm<sup>-1</sup>; ar C-H: aromatic C-H out of plane deformation at 810

305 cm<sup>-1</sup>. **(b)** The clustering of biochar FT-IR spectra based on Ward's hierarchical clustering method  
306 represented as a dendrogram. The distance of the link between any two clusters (or samples) is a  
307 measure of the relative dissimilarity between them.

308

309 *Surface oxidation:* An important feature that stood out when comparing the FTIR spectra of  
310 unaged and aged biochars was the increase in O-containing carboxylic groups, measured by  
311 changes in the relative peak height of the C=O stretch at 1701 cm<sup>-1</sup> wavenumber (Fig. 1a and S.I.  
312 Table S2). Physically aged biochar across pyrolysis temperatures showed the maximum values for  
313 C=O stretch, indicating that the surfaces of physically aged biochar were the most oxidized and  
314 rich in carboxylic groups. Chemical ageing also resulted in surface oxidation. We measured a  
315 slight increase in carboxylic groups for both 350 °C and 550 °C chemically aged chars compared  
316 to unaged chars. The increase in surface oxygenation and O-containing functional groups after  
317 ageing is consistent with the findings of previous studies that investigated changes in surface  
318 chemistry using methods analogous to the physical and chemical treatments used in this study<sup>14,19–</sup>  
319 <sup>22</sup>. For biological ageing, surface oxidation was observed only in the case of 350BIO. We did not  
320 observe any increase in the relative peak height of carboxylic groups in the case of 550BIO  
321 compared to 550UN. This suggests that abiotic oxidation through physical and chemical ageing  
322 methods used in the study resulted in more surface oxidation and carboxylic groups compared to  
323 biotic oxidation through biological ageing. This agrees with the finding of Cheng *et al.*<sup>30</sup>, where  
324 they noted that abiotic processes were more important than biotic processes for the initial surface  
325 oxidation of fresh biochar. Our observations indicate that 350 °C biochars were more oxidized  
326 compared to 550 °C chars within a given ageing treatment (Fig. 1a and S.I. Table S2). This is most  
327 likely due to higher aromatic carbon content in biochar produced at 550 °C that tends to be more

328 condensed and resistant to oxidation while the 350 °C chars have low aromatic carbon content that  
329 is less condensed and amorphous and more likely to undergo oxidation<sup>10,11</sup>. This has been  
330 confirmed by other studies that observed an increase in resistance to oxidation by biochar produced  
331 at higher pyrolysis temperatures<sup>38,58,59</sup>.

332

333 *Surface aromatic and aliphatic groups:* When considering how ageing affected the surface  
334 aromatic and aliphatic groups, we found that pyrolysis temperature was an important factor  
335 controlling these changes. For 350 °C biochars, we consistently observed a decrease in relative  
336 peak height in the 1413 cm<sup>-1</sup> aliphatic C-H stretch, 810 cm<sup>-1</sup> aromatic C-H stretch and 1593 cm<sup>-1</sup>  
337 C=C aromatic stretch regions after ageing. The maximum decrease in peak values was consistently  
338 observed for 350PHY. Additionally, in the case of 350PHY, we measured a considerable decrease  
339 in relative peak height for the aliphatic C-H stretch at 2932 cm<sup>-1</sup> after ageing. In the case of 550  
340 °C char, we observed a considerable decrease in the relative peak height for the aromatic C-H  
341 stretch and a slight decrease in the 1413 cm<sup>-1</sup> aliphatic C-H stretch after ageing but the same was  
342 not observed in the case of the C=C aromatic stretch. These changes indicate a relative loss or  
343 transformation of both surface aliphatic and aromatic carbon groups during ageing. As discussed  
344 earlier, the loss in C could be due to leaching or abiotic oxidation of C during ageing. Further, in  
345 the case of biological ageing, the relative loss in aliphatic C group at 1413 cm<sup>-1</sup> and 2932 cm<sup>-1</sup>  
346 (for 350°C chars) could be a result of decomposition of aliphatic C by soil microbes<sup>24,25,60</sup>. While  
347 it may not be possible to conclusively determine whether oxidized functional groups were  
348 previously associated with aromatic vs. aliphatic compounds, the drop in relative heights in the  
349 aromatic regions (810 and 1593 cm<sup>-1</sup> wavenumbers) accompanied by a relative increase in signal  
350 for carboxyl (1701 cm<sup>-1</sup>) group suggests that the oxidation of aromatic C results in the development

351 of carboxylic groups. It has been previously suggested that oxidation on the edges of the aromatic  
352 backbone of biochar, taking place over a long period of time, could lead to the formation of  
353 negatively charged carboxyl groups<sup>56,61,62</sup>. A loss in aromatic functional groups was documented  
354 during physical ageing of peanut straw biochar<sup>20</sup> and during chemical ageing of pine wood biochar  
355<sup>21</sup>. More recently, Yi *et al.*<sup>63</sup> measured loss and transformation of condensed aromatic C after 9  
356 years of field ageing of high temperature bamboo and rice straw biochar. These previous findings  
357 support the inference that ageing methods used in this study could have caused the disruption of  
358 aromatic carbon to form carboxylic groups.

359

360 It is important to note that FTIR spectra as produced and analyzed in this study are only semi-  
361 quantitative – *i.e.*, a doubling in peak height does not necessarily represent twice as much of the  
362 bond associated with that wavenumber. Furthermore, since replicates for ageing treatments and  
363 FTIR measurements were not included, we cannot determine whether these differences are  
364 statistically significant. However, the spectra represent an average of 265 scans on pooled and  
365 homogenized samples, and consistent responses to ageing at the two different temperatures as well  
366 as consistent temperature effects across different ageing treatments both help give us confidence  
367 in the trends observed here.

368

### 369 **3.3. Effect of ageing on biochar C mineralization**

370 The biochar C mineralization trends for all treatments show a similar pattern overall, with an  
371 initial period of steep increase in C mineralization, followed by the onset of a period of lower C  
372 mineralization (about 350 hours after the start of incubation, Fig. 2). This is comparable to the C  
373 mineralization curves commonly observed in previous incubation studies with soil amended with

374 biochar<sup>28,33,64,65</sup> and biochar inoculated with a microbial community from a forest soil<sup>60,66,67</sup>.  
375 Cumulative biochar C mineralized was significantly higher for 350 °C biochars compared to 550  
376 °C biochars (Tukey test,  $p_{\text{adj}} = 0.003$ ). This is consistent with previous studies that have noted  
377 higher microbial activity and respiration in incubations with low temperature chars<sup>56,67-69</sup>, since  
378 biochar produced at high pyrolysis temperature contains a larger fraction of condensed aromatic  
379 C, which is more difficult for microorganisms to oxidize<sup>11,58,70-72</sup>. Growth on agar surfaces over  
380 the month-long incubation, as measured by total surface area, was higher for 350 °C biochar  
381 treatments as compared to their 550 °C counterparts (S.I. Fig. S2). This corresponds to trends  
382 observed in the cumulative biochar C mineralized over the incubation period, indicating that the  
383 *Streptomyces* strain more effectively colonizes and grows on agar surfaces containing biochar  
384 particles produced at 350 °C.  
385

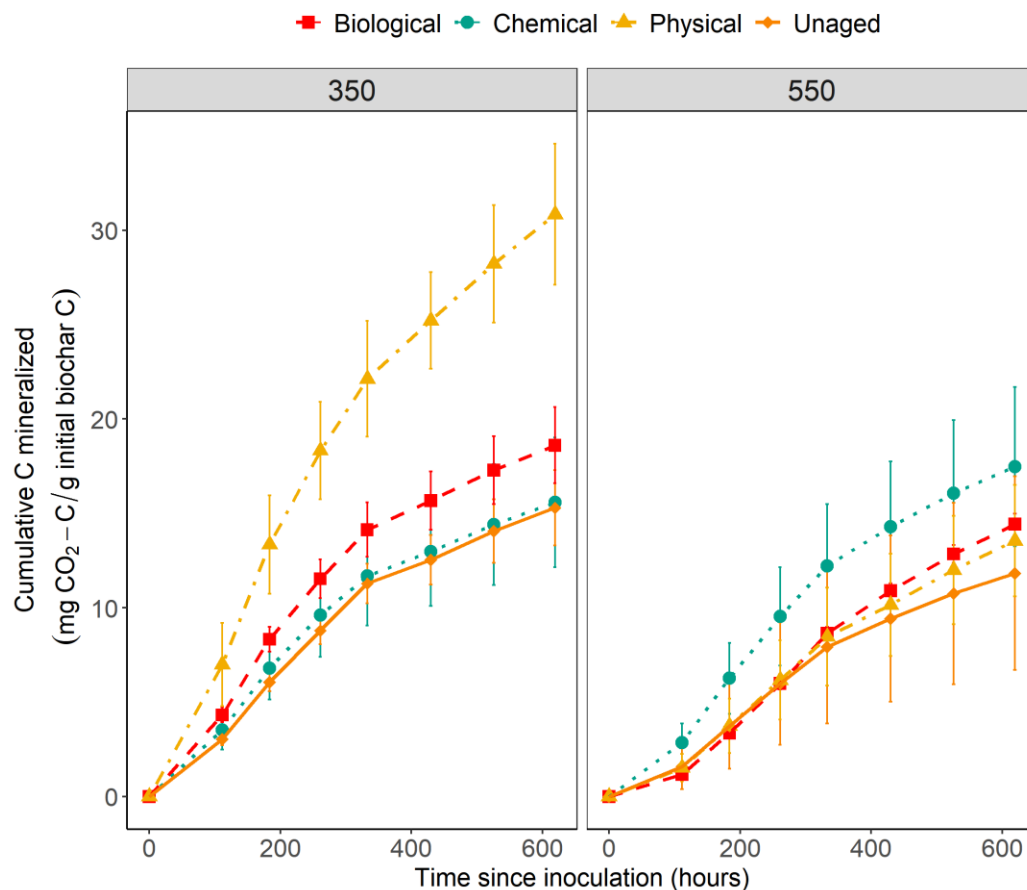

386

387 **Figure 2.** Mean cumulative C mineralized from unaged and physically, chemically and  
388 biologically aged biochar samples over time, with uninoculated blanks subtracted and normalized  
389 with mean biochar-C. N=3 for physical, chemical and unaged, N=5 for biological. Error bars  
390 represent 95% confidence intervals. The left panel shows biochars produced at 350 °C and the  
391 right panel shows biochars produced at 550 °C.

392

393 Amongst the 350 °C chars, the cumulative biochar C mineralized for aged biochars was higher  
394 than that for unaged biochar through the entire incubation period (Fig. 2), although the difference  
395 in C mineralization was statistically significant only in the case of 350PHY (Tukey test,  $p_{adj} =$

396 0.0001). 350PHY treatments also showed the greatest surface growth (S.I. Fig. S2), consistent with  
397 the cumulative biochar C mineralized data.

398

399 Amongst the 550 °C biochars, there were not large differences between cumulative biochar C  
400 mineralization in aged versus unaged biochars. We observed an increase in biochar C mineralized  
401 for 550CHEM compared to unaged biochar through the incubation period and a slight increase in  
402 biochar C mineralization for 550PHY and 550BIO after about 400 hours after the start of  
403 incubation, but the differences in means were not significant (Fig. 2). These observations were  
404 consistent with trends in growth measurements on 550 °C biochar agar surfaces, where the average  
405 surface growth was 43% greater for 550CHEM compared to 550UN but no difference in growth  
406 was observed for 550BIO and 550PHY treatments (S.I. Fig. S2).

407

408 Biochar C mineralization across temperature and ageing treatments was significantly correlated  
409 with elemental composition (Fig. 3) and surface chemistry (Fig. 4). The greatest changes in surface  
410 and bulk chemistry were observed during physical ageing – specifically, we saw the greatest  
411 increase in O/C ratio and carboxyl groups and the greatest loss of aromatic and aliphatic C in  
412 350PHY. These changes were accompanied by significantly higher biochar mineralization  
413 compared to unaged biochar. These correlations were notable across the full dataset for 350 °C  
414 chars. We identified a significant positive correlation between the O/C ratio and cumulative  
415 biochar C mineralized ( $R^2=0.778$ ,  $p<0.001$ ; Fig. 3) and between relative peak height of carboxylic  
416 functional groups and cumulative biochar C mineralized ( $R^2=0.731$ ,  $p<0.001$  for  $1701\text{ cm}^{-1}$ ;  
417  $R^2=0.37$ ,  $p=0.021$  for  $1200\text{ cm}^{-1}$ ; Fig. 4). Conversely, we identified a negative correlation between  
418 aromatic C and cumulative biochar C mineralized ( $R^2 = 0.372$ ,  $p=0.021$  for  $1593\text{ cm}^{-1}$ ;  $R^2 = 0.464$ ,  
419  $p=0.0073$ ; for  $810\text{ cm}^{-1}$ ; Fig. 4) and between aliphatic C and cumulative biochar C mineralized ( $R^2$

420 = 0.869,  $p < 0.001$  for  $1413\text{ cm}^{-1}$ ;  $R^2 = 0.832$ ,  $p < 0.001$ ; for  $2932\text{ cm}^{-1}$ ; Fig. 4). These trends point to  
421 two factors that may primarily be responsible for the increase in mineralization with ageing for  
422  $350^\circ\text{C}$  biochars:

- 423 (i) *higher O/C ratio of aged biochar*: An increase in carboxylic and phenolic groups during  
424 ageing could increase the O/C ratio of biochar, which makes it less stable, more  
425 hydrophilic and more likely to be mineralized by microbes<sup>12,66,72</sup>. This surface-oxidized  
426 biochar is easier to break down and could potentially facilitate the microbial metabolism  
427 of ring structures that would ordinarily be highly recalcitrant<sup>14,17,56</sup>.
- 428 (ii) *oxidation/transformation of surface aromatic carbon to aliphatic C*: Oxidative  
429 transformation of aromatic C to linear alkyl-C and O-alkyl-C<sup>63</sup> could decrease ring  
430 condensation and make carbon more susceptible to microbial breakdown. Further,  
431 studies have documented breakdown and release of aromatic moieties in biochar to low  
432 molecular-weight organic acids during ageing<sup>73,74</sup>.

433

434



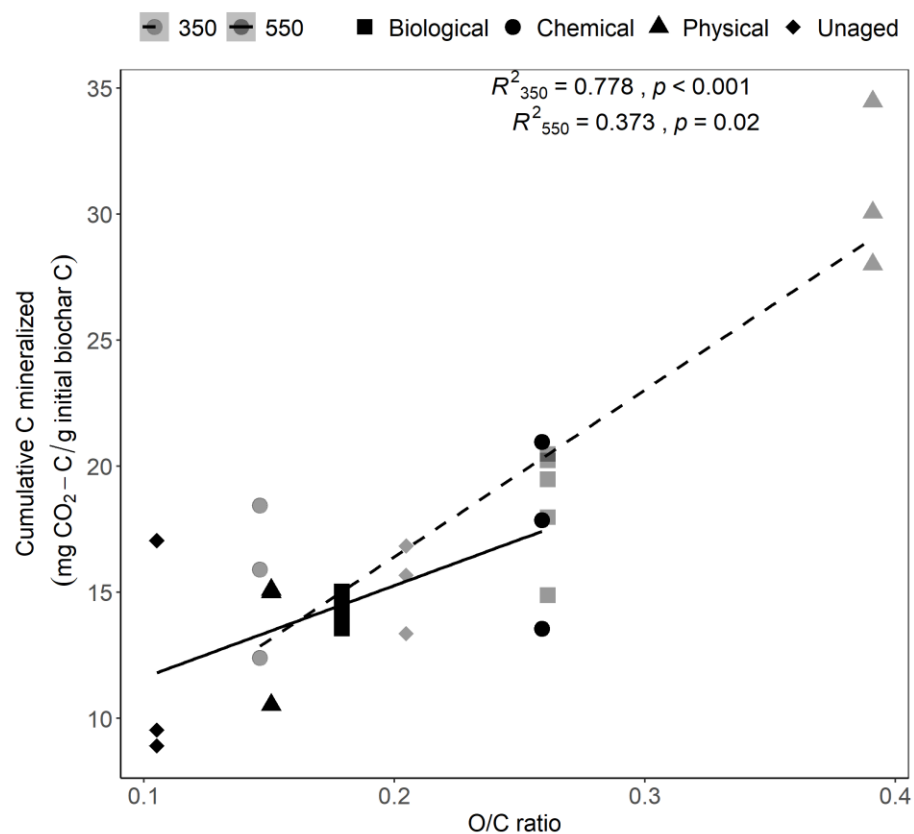

435  
436 **Figure 3.** Relationship between cumulative biochar-C mineralized and molar O/C ratio. Shapes  
437 indicate unaged, physically, chemically and biologically aged biochar samples produced at 350 °C  
438 (light) and 550 °C (dark).

439

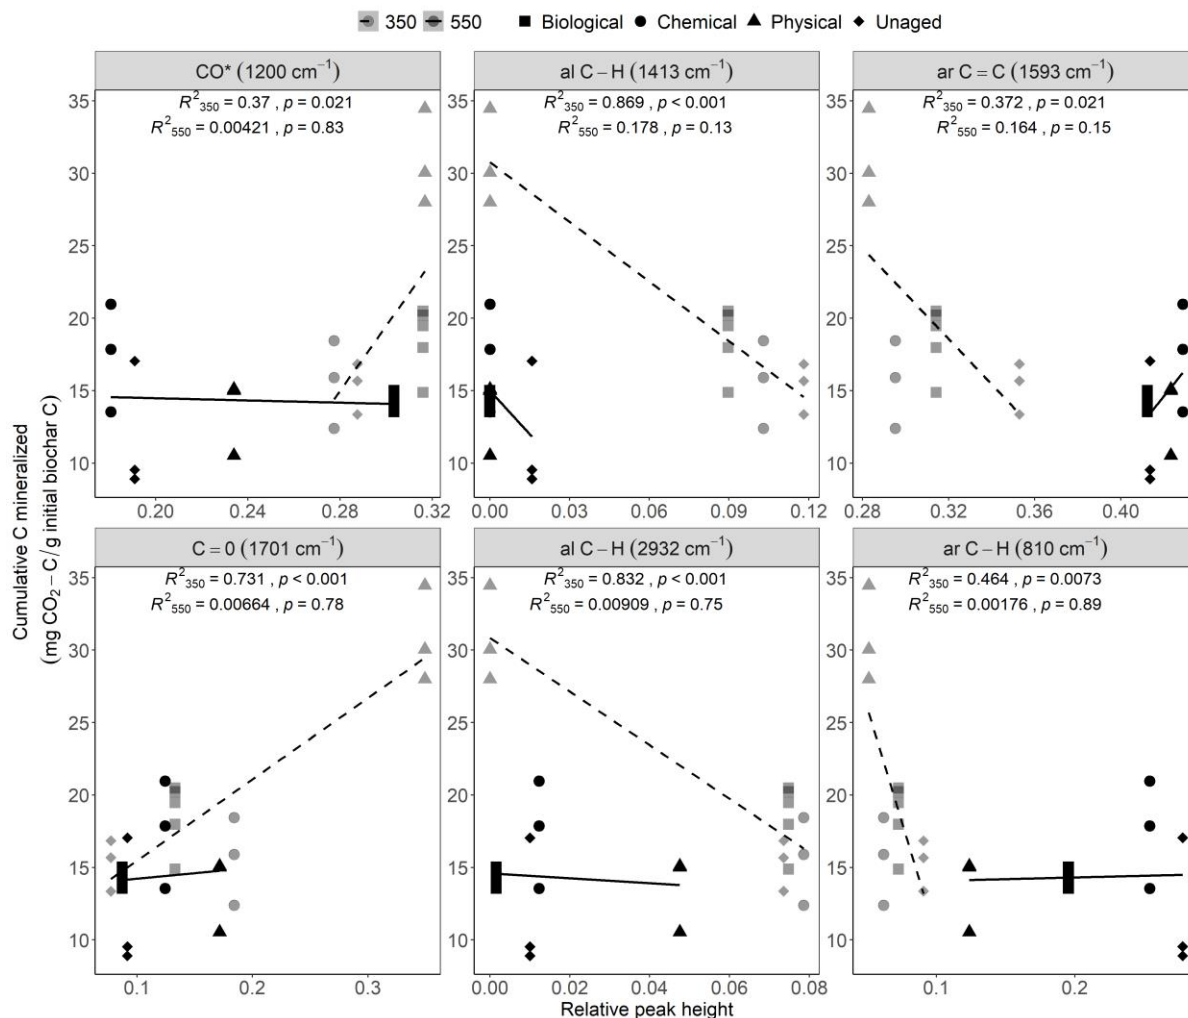

440  
441 **Figure 4.** Relationship between cumulative biochar-C mineralized and FTIR spectra relative peak  
442 heights. Shapes indicate unaged, physically, chemically and biologically aged biochar samples  
443 produced at 350 °C (light) and 550 °C (dark). Panels indicate the peak names assigned to different  
444 functional groups at the given wavelength.

445  
446 For the 550 °C chars, we identified a positive correlation between the O/C ratio and cumulative  
447 biochar C mineralized ( $R^2=0.373, p=0.02$ ; Fig. 3) which suggests an increase in the  
448 mineralizability of biochar during ageing just as in the case of 350°C biochar. However, we were  
449 unable to identify any significant correlations between surface functional groups and cumulative

450 biochar C mineralized (Fig. 4), which is perhaps to be expected, due to the non-significant  
451 differences in mineralization rates across 550 °C aged biochars. Even though increases in surface  
452 oxidation and loss of some surface aromatic and aliphatic C groups were observed during ageing,  
453 550 °C aged chars still retained more aromatic C and were less oxidized than 350 °C aged chars  
454 as observed by measuring FTIR relative heights (S.I. Table S2). As a result, there is likely to be  
455 less easily mineralizable C present in 550 °C biochars, even after ageing. This is in line with other  
456 studies that have documented an inverse relationship between mineralization and aromatic fraction  
457 in biochars<sup>56,68</sup>. This effect is potentially the primary reason we did not observe a significant  
458 increase in biochar C mineralized for 550 °C chars during ageing despite observing changes in the  
459 surface oxidation (Fig. 1a & Fig. 2).

460

461 This study provides evidence that higher O/C ratio and surface oxidation during ageing is likely  
462 to accelerate biochar C mineralization by microbes. In particular, the surface oxidation of the  
463 aromatic C groups has important implications for C management and cycling for both low  
464 temperature biochars and naturally produced wildfire pyrogenic organic matter (PyOM). It has  
465 been suggested that the chemical stability of natural wildfire PyOM produced at high temperatures  
466 is more comparable to low temperature biochars as natural PyOM was found to consist of small  
467 clusters of aromatic C units and not highly condensed polyaromatic structures<sup>75-77</sup>. Based on our  
468 findings, the carbon in these PyOM materials could be more susceptible to surface oxidation and  
469 C loss during ageing which could lead to increased mineralizability and thus decreased C storage  
470 potential.

471

472 The ageing treatments used in this study were designed to simulate real world processes that  
473 occur naturally to biochars in soil. While it is not feasible to develop a scale to quantify the relative  
474 severity of our treatments compared to their expected severity in nature, our study highlights the  
475 role of abiotic factors like freeze-thaw-wet-dry processes in accelerating surface oxidation, which,  
476 in turn, increases the susceptibility of biochar to microbial degradation. There is a need to better  
477 understand the underlying mechanisms of surface oxidation in these processes and to design a  
478 more quantitative method to simulate ageing <sup>34</sup>.

479

480 It is important to note that ageing and incubation of biochar was performed in the absence of  
481 soil (sand medium was used for physical ageing only), to control the processes of interest.  
482 However, we note that in soil systems, biochar-clay interactions, biochar-soil organic matter  
483 interactions as well as physical protection of biochar through aggregate formation are likely to  
484 affect both ageing of biochar and its interactions with microbes <sup>58,78,79</sup>. Further investigation into  
485 changes in bulk and surface properties associated with long term ageing of biochar in biochar  
486 amended soils could help in verification of laboratory biochar ageing and incubation studies as  
487 well as broaden our understanding of the potential of biochar as a C sink <sup>34</sup>.

488

## 489 **Supporting Information**

490 FT-IR functional group peak assignments for biochar (Table S1); FTIR spectra relative peak  
491 heights (Table S2); Images of *Streptomyces* isolate growth on biochar- raw and processed using  
492 ImageJ (Figure S1); Comparison of *Streptomyces* isolate growth on aged and unaged biochar  
493 nutrient agar media (Figure S2); Details of biochar production and chemical analyses (Note S1);

494 Details of biochar nutrient media preparation (Note S2); Effect of ageing on pH (Note S3);  
495 Elemental composition and surface chemistry of unaged biochar (Note S4).

496

#### 497 **Author Contributions**

498 The authors confirm contribution to the paper as follows: study conception and design: NZ, TLW;  
499 data collection: NZ, TDB; analysis and interpretation of results: NZ, TDB, TLW; draft manuscript  
500 preparation: NZ; manuscript review and editing: NZ, TDB, TLW. All authors have reviewed the  
501 results and have given approval to the final version of the manuscript.

#### 502 **Funding sources**

503 This research was supported by the DOE Office of Science, Office of Biological and  
504 Environmental Research (BER), grants no. DE-SC0020351 and no. DE-SC0016365.

#### 505 **Notes**

506 The authors declare no competing financial interest.

#### 507 **Acknowledgements**

508 This research was funded by the U.S. Department of Energy (DE-SC0020351; DE-SC0016365).  
509 We thank Akio Enders for supplying the biochar that we used to isolate *Streptomyces* and for  
510 assistance with biochar production. We are thankful to Kevin Panke-Buisse at USDA ARS,  
511 Maggie Phillips at the Jackson Lab and Kim Sparks at the Cornell Stable Isotope Laboratory for  
512 assistance with chemical analyses. Thanks to Jamie Woollet for isolating *Streptomyces* on biochar  
513 and for all the technical assistance with the incubations. We also thank Monika Fischer and Neem  
514 Patel for supplying the soil samples that we used during biological ageing.

515       **References**

- 516       (1)    International Biochar Initiative. Standardized product definition and product testing  
517       guidelines for biochar that is used in soil. 2015.
- 518       (2)    *Biochar for Environmental Management: Science, Technology and Implementation*, 2nd  
519       ed.; Johannes, L., Stephen, J., Eds.; Routledge: London, 2015.
- 520       (3)    Schmidt, M. W. I.; Noack, A. G. Black carbon in soils and sediments: analysis, distribution,  
521       implications, and current challenges. *Global Biogeochem. Cycles* **2000**, *14* (3), 777–793.
- 522       (4)    Woolf, D.; Amonette, J. E.; Street-Perrott, F. A.; Lehmann, J.; Joseph, S. Sustainable  
523       biochar to mitigate global climate change . *Nat. Commun.* **2010**, *1* (1), 56.
- 524       (5)    Whitman, T.; Scholz, S. M.; Lehmann, J. Biochar projects for mitigating climate change:  
525       an investigation of critical methodology issues for carbon accounting. *Carbon Manag.*  
526       **2010**, *1* (1), 89–107.
- 527       (6)    Whitman, T.; Hanley, K.; Enders, A.; Lehmann, J. Predicting pyrogenic organic matter  
528       mineralization from its initial properties and implications for carbon management. *Org.*  
529       *Geochem.* **2013**, *64*, 76–83.
- 530       (7)    Campbell, J. L.; Sessions, J.; Smith, D.; Trippe, K. Potential carbon storage in biochar made  
531       from logging residue: basic principles and southern Oregon case studies. *PLoS One* **2018**,  
532       *13* (9), e0203475.
- 533       (8)    Baldock, J.; Smernik, R. Chemical composition and bioavailability of thermally altered  
534       Pinus resinosa (Red pine) wood. *Org. Geochem.* **2002**, *33*, 1093–1109.

- 535 (9) Preston, C. M.; Schmidt, M. W. I. Black (pyrogenic) carbon: a synthesis of current  
536 knowledge and uncertainties with special consideration of boreal regions. *Biogeosciences*  
537 **2006**, *3* (4), 397–420.
- 538 (10) Nguyen, B. T.; Lehmann, J.; Hockaday, W. C.; Joseph, S.; Masiello, C. A. Temperature  
539 sensitivity of black carbon decomposition and oxidation. *Environ. Sci. Technol.* **2010**, *44*  
540 (9), 3324–3331.
- 541 (11) Keiluweit, M.; Nico, P. S.; Johnson, M. G.; Kleber, M. Dynamic molecular structure of  
542 plant biomass-derived black carbon (biochar). *Environ. Sci. Technol.* **2010**, *44* (4), 1247–  
543 1253.
- 544 (12) Spokas, K. A. Review of the stability of biochar in soils: predictability of O:C molar ratios.  
545 *Carbon Manag.* **2010**, *1* (2), 289–303.
- 546 (13) Enders, A.; Hanley, K.; Whitman, T.; Joseph, S.; Lehmann, J. Characterization of biochars  
547 to evaluate recalcitrance and agronomic performance. *Bioresour. Technol.* **2012**, *114*, 644–  
548 653.
- 549 (14) Cheng, C.-H.; Lehmann, J. Ageing of black carbon along a temperature gradient.  
550 *Chemosphere* **2009**, *75* (8), 1021–1027.
- 551 (15) Mukherjee, A.; Zimmerman, A. R.; Hamdan, R.; Cooper, W. T. Physicochemical changes  
552 in pyrogenic organic matter (biochar) after 15 months of field aging. *Solid Earth* **2014**, *5*,  
553 693–704.
- 554 (16) Singh, B.; Fang, Y.; Johnston, C. T. A Fourier-Transform Infrared study of biochar aging  
555 in soils. *Soil Sci. Soc. Am. J.* **2016**, *80* (3), 613–622.

- 556 (17) Mia, S.; Dijkstra, F. A.; Singh, B. Chapter one - Long-term aging of biochar: a molecular  
557 understanding with agricultural and environmental implications. In *Advances in Agronomy*;  
558 Elsevier: Amsterdam, 2017; pp 1–51.
- 559 (18) Hale, S. E.; Hanley, K.; Lehmann, J.; Zimmerman, A. R.; Cornelissen, G. Effects of  
560 chemical, biological, and physical aging as well as soil addition on the sorption of pyrene  
561 to activated carbon and biochar. *Environ. Sci. Technol.* **2012**, *46* (4), 2479–2480.
- 562 (19) Xu, Z.; Xu, X.; Tsang, D. C. W.; Cao, X. Contrasting impacts of pre- and post-application  
563 aging of biochar on the immobilization of Cd in contaminated soils. *Environ. Pollut.* **2018**,  
564 *242* (Pt B), 1362–1370.
- 565 (20) Cao, Y.; Jing, Y.; Hao, H.; Wang, X. Changes in the physicochemical characteristics of  
566 peanut straw biochar after freeze-thaw and dry-wet aging treatments of the biomass.  
567 *BioResources* **2019**, *14* (2), 4329–4343.
- 568 (21) Huff, M. D.; Lee, J. W. Biochar-surface oxygenation with hydrogen peroxide. *J. Environ.*  
569 *Manage.* **2016**, *165*, 17–21.
- 570 (22) Gámiz, B.; Hall, K.; Spokas, K. A.; Cox, L. Understanding activation effects on low-  
571 temperature biochar for optimization of herbicide sorption. *Agronomy* **2019**, *9* (10), 588.
- 572 (23) Cross, A.; Sohi, S. P. A method for screening the relative long-term stability of biochar.  
573 *GCB Bioenergy* **2013**, *5*, 215–220.
- 574 (24) Kuzyakov, Y.; Subbotina, I.; Chen, H.; Bogomolova, I.; Xu, X. Black carbon decomposition  
575 and incorporation into soil microbial biomass estimated by <sup>14</sup>C labeling. *Soil Biol.*  
576 *Biochem.* **2009**, *41* (2), 210–219.



- 577 (25) Kuzyakov, Y.; Bogomolova, I.; Glaser, B. Biochar stability in soil: decomposition during  
578 eight years and transformation as assessed by compound-specific <sup>14</sup>C analysis. *Soil Biol.*  
579 *Biochem.* **2014**, *70*, 229–236.
- 580 (26) Santos, F.; Torn, M. S.; Bird, J. A. Biological degradation of pyrogenic organic matter in  
581 temperate forest soils. *Soil Biol. Biochem.* **2012**, *51*, 115–124.
- 582 (27) Farrell, M.; Kuhn, T. K.; Macdonald, L. M.; Maddern, T. M.; Murphy, D. V.; Hall, P. A.;  
583 Singh, B. P.; Baumann, K.; Krull, E. S.; Baldock, J. A. Microbial utilisation of biochar-  
584 derived carbon. *Sci. Total Environ.* **2013**, *465*, 288–297.
- 585 (28) Whitman, T.; Zhu, Z.; Lehmann, J. Carbon mineralizability determines interactive effects  
586 on mineralization of pyrogenic organic matter and soil organic carbon. *Environ. Sci.*  
587 *Technol.* **2014**, *48* (23), 13727–13734.
- 588 (29) Jones, D. L.; Edwards-Jones, G.; Murphy, D. V. Biochar mediated alterations in herbicide  
589 breakdown and leaching in soil. *Soil Biol. Biochem.* **2011**, *43*, 804–813.
- 590 (30) Cheng, C.-H.; Lehmann, J.; Thies, J. E.; Burton, S. D.; Engelhard, M. H. Oxidation of black  
591 carbon by biotic and abiotic processes. *Org. Geochem.* **2006**, *37* (11), 1477–1488.
- 592 (31) Liu, Z.; Demisie, W.; Zhang, M. Simulated degradation of biochar and its potential  
593 environmental implications. *Environ. Pollut.* **2013**, *179*, 146–152.
- 594 (32) Spokas, K. Impact of biochar field aging on laboratory greenhouse gas production  
595 potentials. *GCB Bioenergy* **2013**, *5*, 165–176.
- 596 (33) Liu, Z.; Zhu, M.; Wang, J.; Liu, X.; Guo, W.; Zheng, J.; Bian, R.; Wang, G.; Zhang, X.;  
597 Cheng, K.; Liu, X.; Li, L.; Pan, G. The responses of soil organic carbon mineralization and

- 598 microbial communities to fresh and aged biochar soil amendments. *GCB Bioenergy* **2019**,  
599 *11* (12), 1408–1420.
- 600 (34) Wang, L.; O'Connor, D.; Rinklebe, J.; Ok, Y. S.; Tsang, D. C. W.; Shen, Z.; Hou, D.  
601 Biochar aging: mechanisms, physicochemical changes, assessment, and implications for  
602 field applications. *Environ. Sci. Technol.* **2020**, *54* (23), 14797–14814.
- 603 (35) Güereña, D. T.; Lehmann, J.; Thies, J. E.; Enders, A.; Karanja, N.; Neufeldt, H. Partitioning  
604 the contributions of biochar properties to enhanced biological nitrogen fixation in common  
605 bean (*Phaseolus vulgaris*). *Biol. Fertil. soils* **2015**, *51* (4), 479–491.
- 606 (36) Biasutti, M.; Seager, R. Projected changes in US rainfall erosivity. *Hydrol. Earth Syst. Sci.*  
607 **2015**, *19* (6), 2945–2961.
- 608 (37) Boswell, E. P.; Balster, N. J.; Bajcz, A. W.; Thompson, A. M. Soil aggregation returns to a  
609 set point despite seasonal response to snow manipulation. *Geoderma* **2020**, *357*, 113954.
- 610 (38) Han, L.; Ro, K.; Wang, Y.; Sun, K.; Sun, H.; Libra, J.; Xing, B. Oxidation resistance of  
611 biochars as a function of feedstock and pyrolysis condition. *Sci. Total Environ.* **2017**, *616–*  
612 *617*, 335–344.
- 613 (39) Blodgett Forest Research Station | Berkeley Forests  
614 <https://forests.berkeley.edu/forests/blodgett>.
- 615 (40) Stevenson, B. S.; Eichorst, S. A.; Wertz, J. T.; Schmidt, T. M.; Breznak, J. A. New strategies  
616 for cultivation and detection of previously uncultured microbes. *Appl. Environ. Microbiol.*  
617 **2004**, *70* (8), 4748–4755.
- 618 (41) Widdel, F.; Bak, F. Gram-negative mesophilic sulfate-reducing bacteria. In *The*

- 619 *Prokaryotes*; Balows, A., Trüper, H. G., Dworkin, M., Harder, W., Schleifer, K.-H., Eds.;
- 620 Springer New York: New York, NY, 1992; pp 3352–3378.
- 621 (42) Galili, T. dendextend: an R package for visualizing, adjusting, and comparing trees of
- 622 hierarchical clustering. *Bioinformatics* **2015**.
- 623 (43) Woolet, J.; Whitman, T. Pyrogenic organic matter effects on soil bacterial community
- 624 composition. *Soil Biol. Biochem.* **2020**, *141*, 107678.
- 625 (44) Hartman, D. Perfecting your spread plate technique. *J. Microbiol. Biol. Educ.* **2011**, *12* (2),
- 626 204–205.
- 627 (45) Berry, T.; Creelman, C.; Nickerson, N.; Enders, A.; Whitman, T. An open-source,
- 628 automated, gas sampling peripheral for laboratory incubation experiments. Manuscript
- 629 submitted for publication 2020.
- 630 (46) Wickham, H.; Averick, M.; Bryan, J.; Chang, W.; McGowan, L. D.; Francois, R.;
- 631 Grolemond, G.; Hayes, A.; Henry, L.; Hester, J.; Kuhn, M.; Pedersen, T. L.; Miller, E.;
- 632 Bache, S. M.; Muller, K.; Ooms, J.; Robinson, D.; Seidel, D. P.; Spinu, V.; Takahashi, K.;
- 633 Vaughan, D.; Wilke, C.; Woo, K.; Yutani, H. Welcome to the tidyverse. *J. Open Source*
- 634 *Softw.* **2019**, *4* (43), 1686.
- 635 (47) Zeileis, A.; Grothendieck, G. zoo: S3 infrastructure for regular and irregular time series. *J.*
- 636 *Stat. Softw.* **2005**, *14* (6), 1–27.
- 637 (48) Neuwirth, E. RColorBrewer: ColorBrewer palettes. 2014.
- 638 (49) Robinson, D.; Hayes, A. broom: convert statistical analysis objects into tidy tibbles. 2020.

- 639 (50) Wickham, H.; Francois, R.; Henry, L.; Muller, K. *dplyr: a grammar of data manipulation*.  
640 2020.
- 641 (51) Wickham, H.; Henry, L. *tidyr: tidy messy data*. 2020.
- 642 (52) Wickham, H. *Ggplot2: Elegant Graphics for Data Analysis*; Springer-Verlag New York,  
643 2016.
- 644 (53) Ram, K.; Wickham, H. *wesanderson: a Wes Anderson palette generator*. 2018.
- 645 (54) Schneider, C. A.; Rasband, W. S.; Eliceiri, K. W. NIH Image to ImageJ: 25 years of image  
646 analysis. *Nat. Methods* **2012**, *9* (7), 671–675.
- 647 (55) Quan, G.; Fan, Q.; Zimmerman, A. R.; Sun, J.; Cui, L.; Wang, H.; Gao, B.; Yan, J. Effects  
648 of laboratory biotic aging on the characteristics of biochar and its water-soluble organic  
649 products. *J. Hazard. Mater.* **2020**, *382*, 121071.
- 650 (56) Bruun, E.; Hauggaard-Nielsen, H.; Ibrahim, N.; Egsgaard, H.; Ambus, P.; Jensen, P.; Dam-  
651 Johansen, K. Influence of fast pyrolysis temperature on biochar labile fraction and short-  
652 term carbon loss in a loamy soil. *Biomass Bioenergy* **2011**, *35* (3), 1182–1189.
- 653 (57) Tomczyk, A.; Sokołowska, Z.; Boguta, P. Biochar physicochemical properties: pyrolysis  
654 temperature and feedstock kind effects. *Rev. Environ. Sci. Bio/Technology* **2020**, *19*, 191–  
655 215.
- 656 (58) Singh, B. P.; Cowie, A. L.; Smernik, R. J. Biochar carbon stability in a clayey soil as a  
657 function of feedstock and pyrolysis temperature. *Environ. Sci. Technol.* **2012**, *46* (21),  
658 11770–11778.

- 659 (59) Crombie, K.; Mašek, O.; Sohi, S. P.; Brownsort, P.; Cross, A. The effect of pyrolysis  
660 conditions on biochar stability as determined by three methods. *GCB Bioenergy* **2013**, *5* (2),  
661 122–131.
- 662 (60) Zimmerman, A. R.; Ouyang, L. Priming of pyrogenic C (biochar) mineralization by  
663 dissolved organic matter and vice versa. *Soil Biol. Biochem.* **2019**, *130*, 105–112.
- 664 (61) Glaser, B.; Lehmann, J.; Zech, W. Ameliorating physical and chemical properties of highly  
665 weathered soils in the tropics with charcoal – a review. *Biol. Fertil. Soils* **2002**, *35* (4), 219–  
666 230.
- 667 (62) Liang, B.; Lehmann, J.; Solomon, D.; Kinyangi, J.; Grossman, J.; O’Neill, B.; Skjemstad,  
668 J. O.; Thies, J.; Luizão, F. J.; Petersen, J.; Neves, E. G. Black carbon increases cation  
669 exchange capacity in soils. *Soil Sci. Soc. Am. J.* **2006**, *70* (5), 1719–1730.
- 670 (63) Yi, Q.; Liang, B.; Nan, Q.; Wang, H.; Zhang, W.; Wu, W. Temporal physicochemical  
671 changes and transformation of biochar in a rice paddy: insights from a 9-year field  
672 experiment. *Sci. Total Environ.* **2020**, *721*, 137670.
- 673 (64) Whitman, T.; Enders, A.; Lehmann, J. Pyrogenic carbon additions to soil counteract positive  
674 priming of soil carbon mineralization by plants. *Soil Biol. Biochem.* **2014**, *73*, 33–41.
- 675 (65) Whitman, T.; Pepe-Ranney, C.; Enders, A.; Koechli, C.; Campbell, A.; Buckley, D. H.;  
676 Lehmann, J. Dynamics of microbial community composition and soil organic carbon  
677 mineralization in soil following addition of pyrogenic and fresh organic matter. *ISME J.*  
678 **2016**, *10*, 2918–2930.
- 679 (66) Zimmerman, A. R. Abiotic and microbial oxidation of laboratory-produced black carbon

- 680 (biochar). *Environ. Sci. Technol.* **2010**, *44* (4), 1295–1301.
- 681 (67) Zimmerman, A.; Gao, B.; Ahn, M.-Y. Positive and negative carbon mineralization priming  
682 effects among a variety of biochar-amended soils. *Soil Biol. Biochem.* **2011**, *43*, 1169–1179.
- 683 (68) Dai, Z.; Barberán, A.; Li, Y.; Brookes, P. C.; Xu, J. Bacterial community composition  
684 associated with pyrogenic organic matter (biochar) varies with pyrolysis temperature and  
685 colonization environment. *mSphere* **2017**, *2* (2), e00085-17.
- 686 (69) Luo, Y.; Durenkamp, M.; De Nobili, M.; Lin, Q.; Brookes, P. C. Short term soil priming  
687 effects and the mineralisation of biochar following its incorporation to soils of different pH.  
688 *Soil Biol. Biochem.* **2011**, *43* (11), 2304–2314.
- 689 (70) Wiedemeier, D. B.; Abiven, S.; Hockaday, W. C.; Keiluweit, M.; Kleber, M.; Masiello, C.  
690 A.; McBeath, A. V.; Nico, P. S.; Pyle, L. A.; Schneider, M. P. W.; Smernik, R. J.;  
691 Wiesenberg, G. L. B.; Schmidt, M. W. I. Aromaticity and degree of aromatic condensation  
692 of char. *Org. Geochem.* **2015**, *78*, 135–143.
- 693 (71) Wang, T.; Camps Arbestain, M.; Hedley, M. Predicting C aromaticity of biochars based on  
694 their elemental composition. *Org. Geochem.* **2013**, *62*, 1–6.
- 695 (72) Harvey, O. R.; Kuo, L.-J.; Zimmerman, A. R.; Louchouart, P.; Amonette, J. E.; Herbert, B.  
696 E. An index-based approach to assessing recalcitrance and soil carbon sequestration  
697 potential of engineered black carbons (biochars). *Environ. Sci. Technol.* **2012**, *46* (3), 1415–  
698 1421.
- 699 (73) Yao, F. X.; Arbestain, M. C.; Virgel, S.; Blanco, F.; Arostegui, J.; Maciá-Agulló, J. A.;  
700 Macías, F. Simulated geochemical weathering of a mineral ash-rich biochar in a modified

- 701           soxhlet reactor. *Chemosphere* **2010**, *80* (7), 724–732.
- 702   (74) Hammes, K.; Smernik, R. J.; Skjemstad, J. O.; Schmidt, M. W. I. Characterisation and  
703           evaluation of reference materials for black carbon analysis using elemental composition,  
704           colour, BET surface area and <sup>13</sup>C NMR spectroscopy. *Appl. Geochemistry* **2008**, *23* (8),  
705           2113–2122.
- 706   (75) Knicker, H.; Hilscher, A.; González-Vila, F. J.; Almendros, G. A new conceptual model for  
707           the structural properties of char produced during vegetation fires. *Org. Geochem.* **2008**, *39*,  
708           935–939.
- 709   (76) Schneider, M. P. W.; Pyle, L. A.; Clark, K. L.; Hockaday, W. C.; Masiello, C. A.; Schmidt,  
710           M. W. I. Toward a “molecular thermometer” to estimate the charring temperature of  
711           wildland charcoals derived from different biomass sources. *Environ. Sci. Technol.* **2013**, *47*  
712           (20), 11490–11495.
- 713   (77) Santín, C.; Doerr, S. H.; Merino, A.; Bucheli, T. D.; Bryant, R.; Ascough, P.; Gao, X.;  
714           Masiello, C. A. Carbon sequestration potential and physicochemical properties differ  
715           between wildfire charcoals and slow-pyrolysis biochars. *Sci. Rep.* **2017**, *7*, 11233.
- 716   (78) Cheng, C.-H.; Lehmann, J.; Engelhard, M. H. Natural oxidation of black carbon in soils:  
717           Changes in molecular form and surface charge along a climosequence. *Geochim.*  
718           *Cosmochim. Acta* **2008**, *72* (6), 1598–1610.
- 719   (79) Wang, J.; Xiong, Z.; Kuzyakov, Y. Biochar stability in soil: meta-analysis of decomposition  
720           and priming effects. *GCB Bioenergy* **2016**, *8* (3), 512–523.
